# Supplementary material
Source: Royal Society of Chemistry journal article supplement (doi:10.1039/d5lp00407a)
Supplement: d5lp00407a1.pdf [file d5lp00407a1.pdf]

## Supplementary Information

### **Tuning the Functionality of Acrylated Vegetable Oil: Impact on the Physicochemical Properties of the 3D Printed Network**

Anthony Jolly,<sup>a</sup> Ana Tanase<sup>a</sup>, Étienne Durand-Laberge<sup>a</sup> and Audrey Laventure\*<sup>a</sup>

<sup>a</sup>. Département de chimie, Université de Montréal, 1375 Ave. Thérèse-Lavoie-Roux, Montréal, QC Canada H2V 0B3

\*Corresponding author: [audrey.laventure@umontreal.ca](mailto:audrey.laventure@umontreal.ca)

|                                                                                                                          |   |
|--------------------------------------------------------------------------------------------------------------------------|---|
| <b>Figure S1.</b> Homemade apparatus used for Jacobs curve measurements.....                                             | 2 |
| <b>Figure S2.</b> ACO structure and <sup>1</sup> H NMR of the canola oil and of ACO1-5.....                              | 3 |
| <b>Figure S3.</b> Average acrylate functionality as a function of the oil quantity used in the acrylation reaction. .... | 4 |
| <b>Figure S4.</b> FTIR spectra of A) Acrylated canola oil (ACO) and Cured ACO and B) ACO1-ACO5. ....                     | 5 |
| <b>Figure S5.</b> UV-Vis spectra of ACO with varying acrylate functionality. ....                                        | 6 |
| <b>Figure S6.</b> Thermogravimetric analyses of ACO1-5.....                                                              | 6 |
| <b>Figure S7.</b> DSC analyses of ACO1-5.....                                                                            | 8 |
| <b>Figure S8.</b> Print fidelity measurements of the printed Hogwarts castle.....                                        | 9 |
| <br>                                                                                                                     |   |
| <b>Table S1.</b> Mechanical characterization of ACO1-5.....                                                              | 7 |
| <b>Table S2.</b> Decomposition temperatures of ACO1-5 at 5% weight loss. ....                                            | 7 |
| <b>Table S3.</b> Glass transition temperature of ACO1-5.....                                                             | 7 |

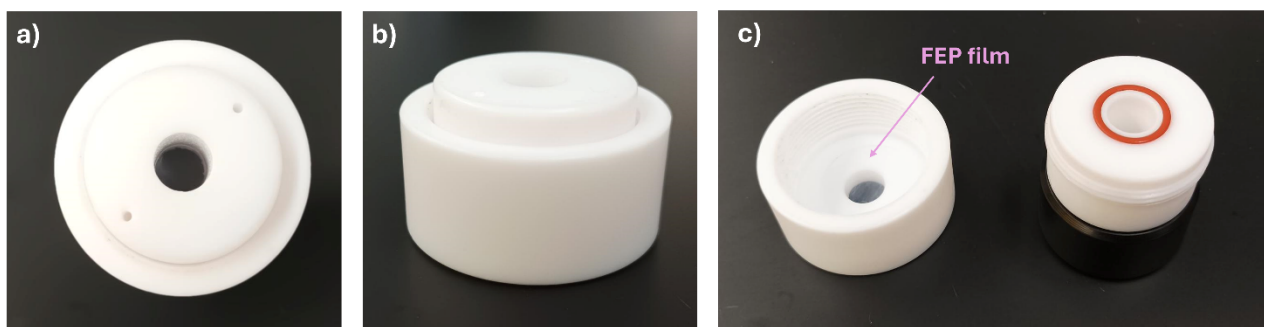

**Figure S1.** Homemade apparatus used for Jacobs curve measurements: (a) top view, (b) side view, and (c) apparatus separated into two parts.

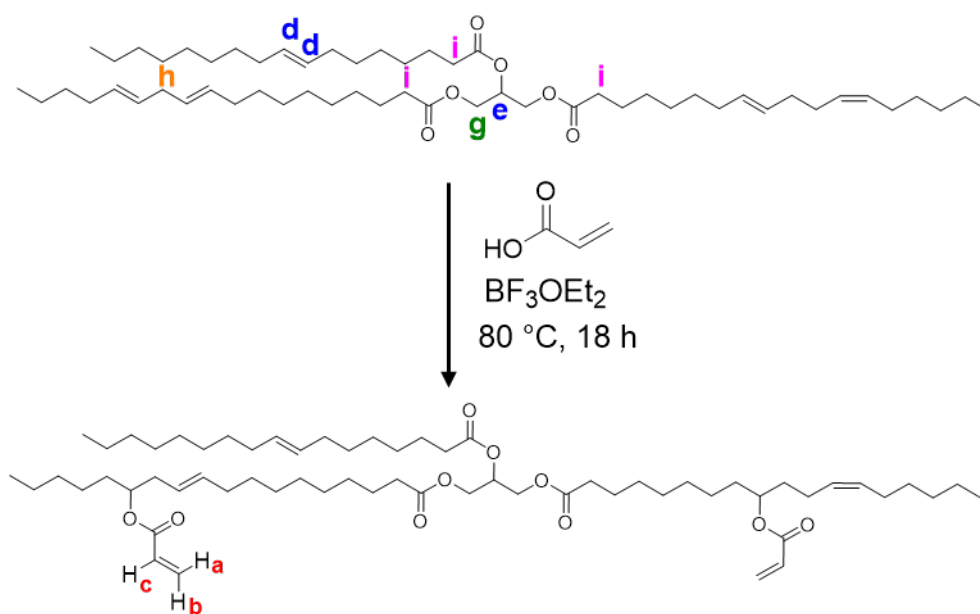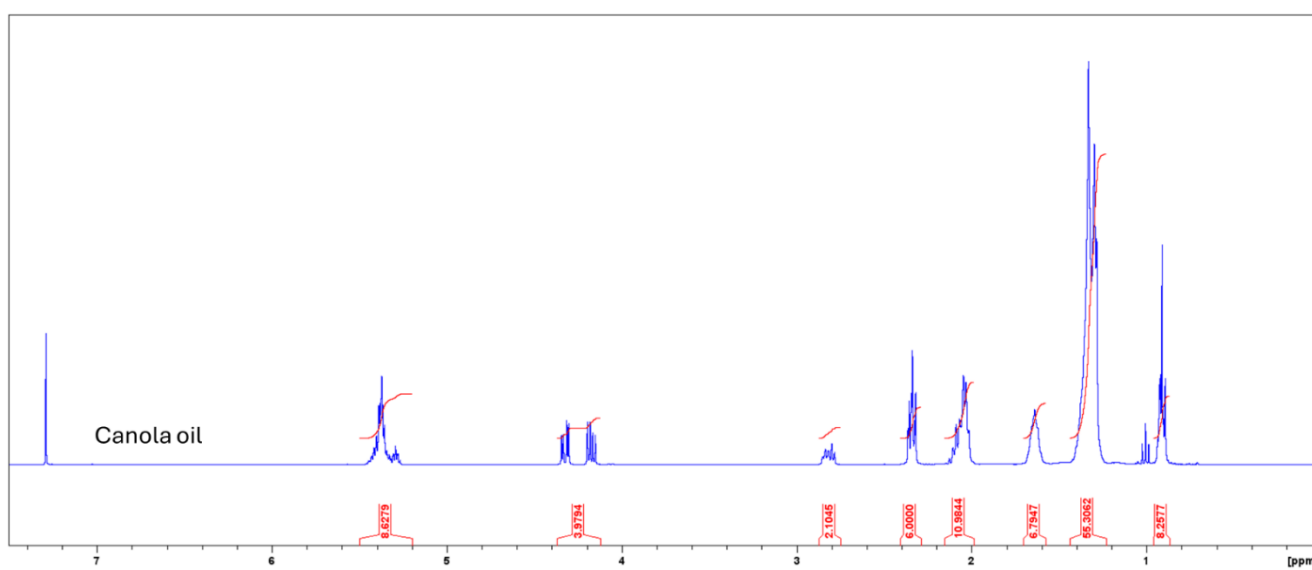

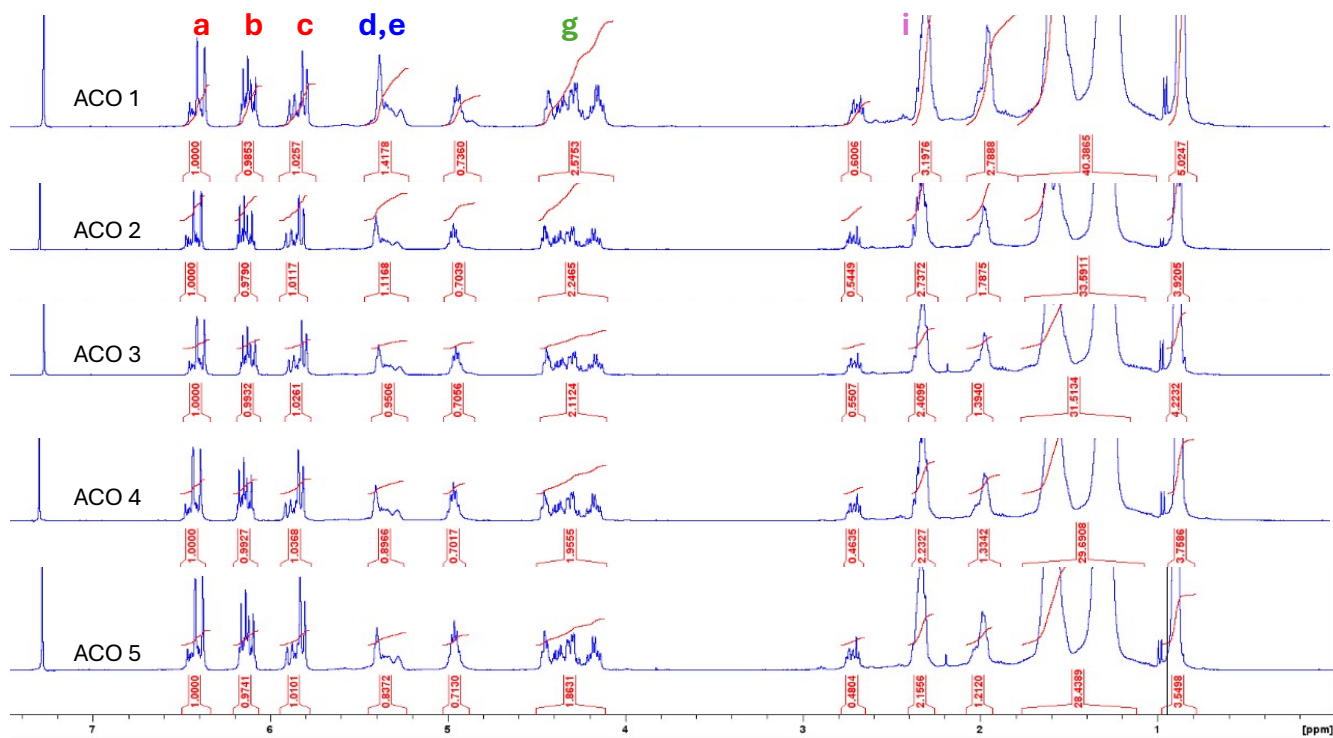

Figure S2. ACO structure and  $^1\text{H}$  NMR of the canola oil and of ACO1-5

**Calculations:**

$$\text{Double bonds per oil molecule, DB} = \frac{[A_{d,e} - (A_g/4)] / 2}{\left(\frac{A_i}{6}\right)} = 3.82$$

$$\text{Average acrylate functionality, } \bar{f} = \frac{A_a}{A_i/6}$$

$$\text{Conversion} = \frac{\bar{f}}{\text{DB}}$$

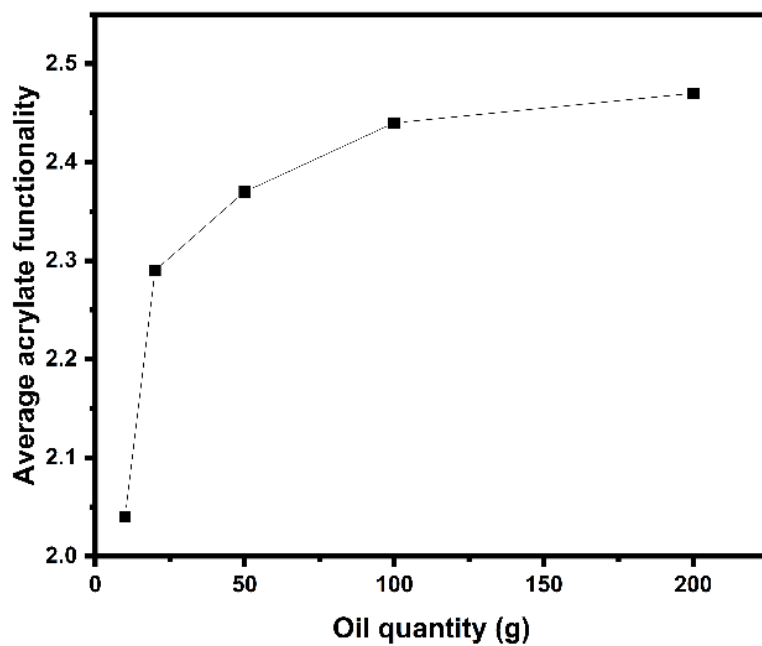

**Figure S3.** Average acrylate functionality as a function of the oil quantity used in the acrylation reaction. 16 equiv. of acrylic acid were used for all reactions.

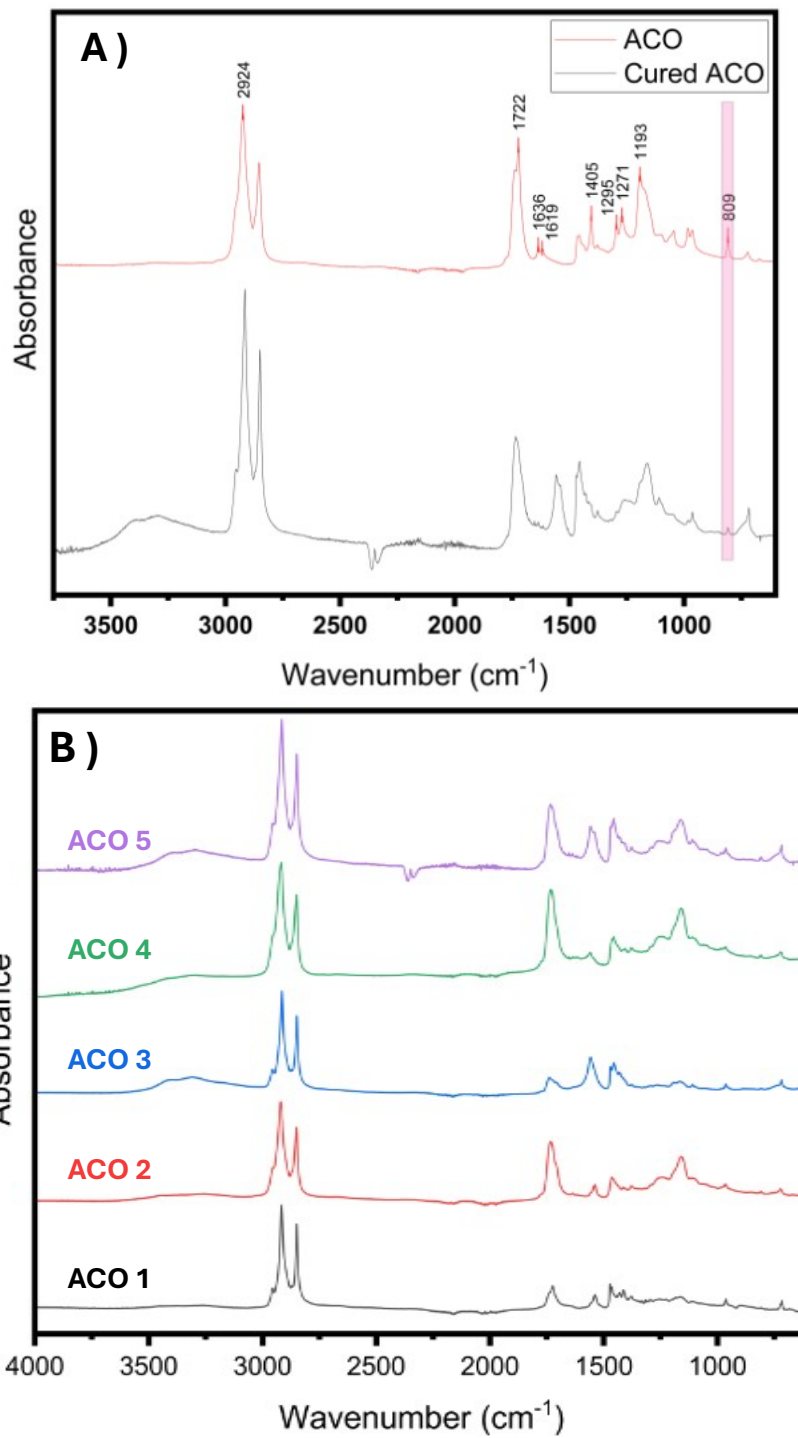

|                               | ACO 1 | ACO 2 | ACO 3 | ACO 4 | ACO 5 |
|-------------------------------|-------|-------|-------|-------|-------|
| Polymerization conversion (%) | 76    | 82    | 75    | 82    | 73    |

**Figure S4.** FTIR spectra of A) Acrylated canola oil (ACO) and Cured ACO and B) ACO1-ACO5 with polymerization conversion.

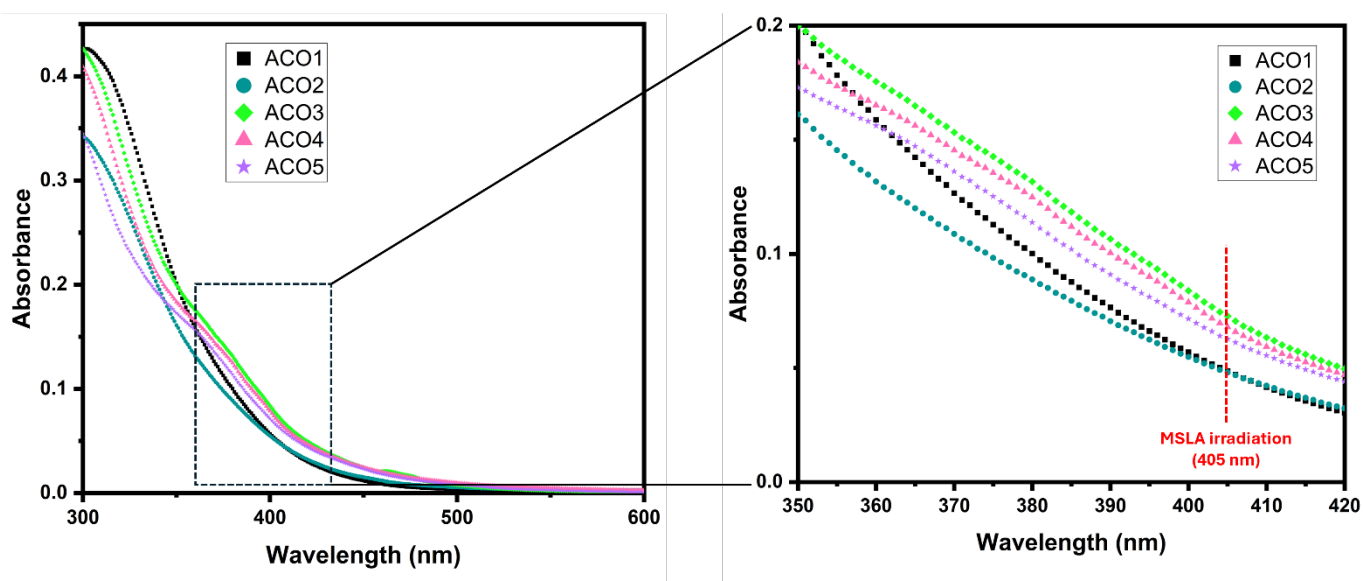

Figure S5. UV-Vis spectra of ACO with varying acrylate functionality.

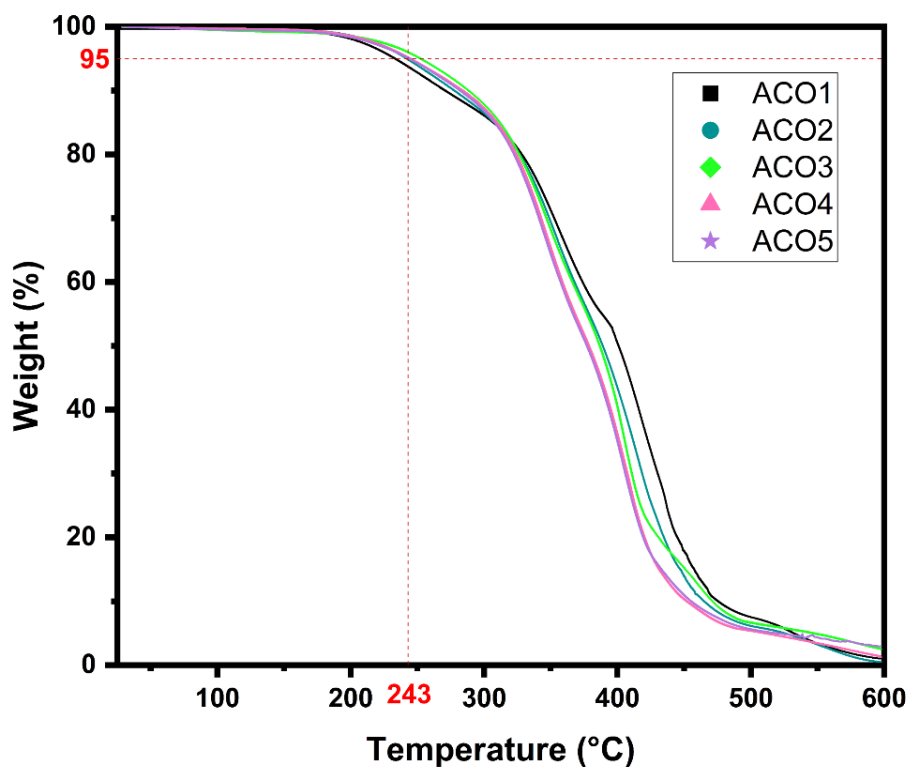

Figure S6. Thermogravimetric analyses of ACO1-5. The degradation temperature was determined at 5 % of weight loss. It was found to be around  $243\text{ }^{\circ}\text{C} \pm 10\text{ }^{\circ}\text{C}$ .

**Table S1.** Mechanical characterization of ACO1-5

| Compounds | Mechanical properties |                                 |                         |
|-----------|-----------------------|---------------------------------|-------------------------|
|           | Tensile modulus (MPa) | Ultimate Tensile Strength (MPa) | Elongation at break (%) |
| ACO1      | 9 ± 1                 | 0.26 ± 0.02                     | 4.0 ± 0.3               |
| ACO2      | 11 ± 2                | 0.37 ± 0.11                     | 4.0 ± 0.8               |
| ACO3      | 13 ± 1                | 0.40 ± 0.05                     | 3.8 ± 0.5               |
| ACO4      | 17 ± 1                | 0.52 ± 0.11                     | 4.6 ± 0.5               |
| ACO5      | 18 ± 1                | 0.47 ± 0.11                     | 3.1 ± 0.9               |

**Table S2.** Decomposition temperatures of ACO1-5 at 5% weight loss.

| Compounds | T <sub>5%</sub> (°C) |
|-----------|----------------------|
| ACO1      | 233                  |
| ACO2      | 242                  |
| ACO3      | 252                  |
| ACO4      | 245                  |
| ACO5      | 244                  |

**Table S3.** Glass transition temperature of ACO1-5

| Compounds | T <sub>g</sub> (°C) |
|-----------|---------------------|
| ACO1      | -2                  |
| ACO2      | -1                  |
| ACO3      | -6                  |
| ACO4      | -9                  |
| ACO5      | -7                  |

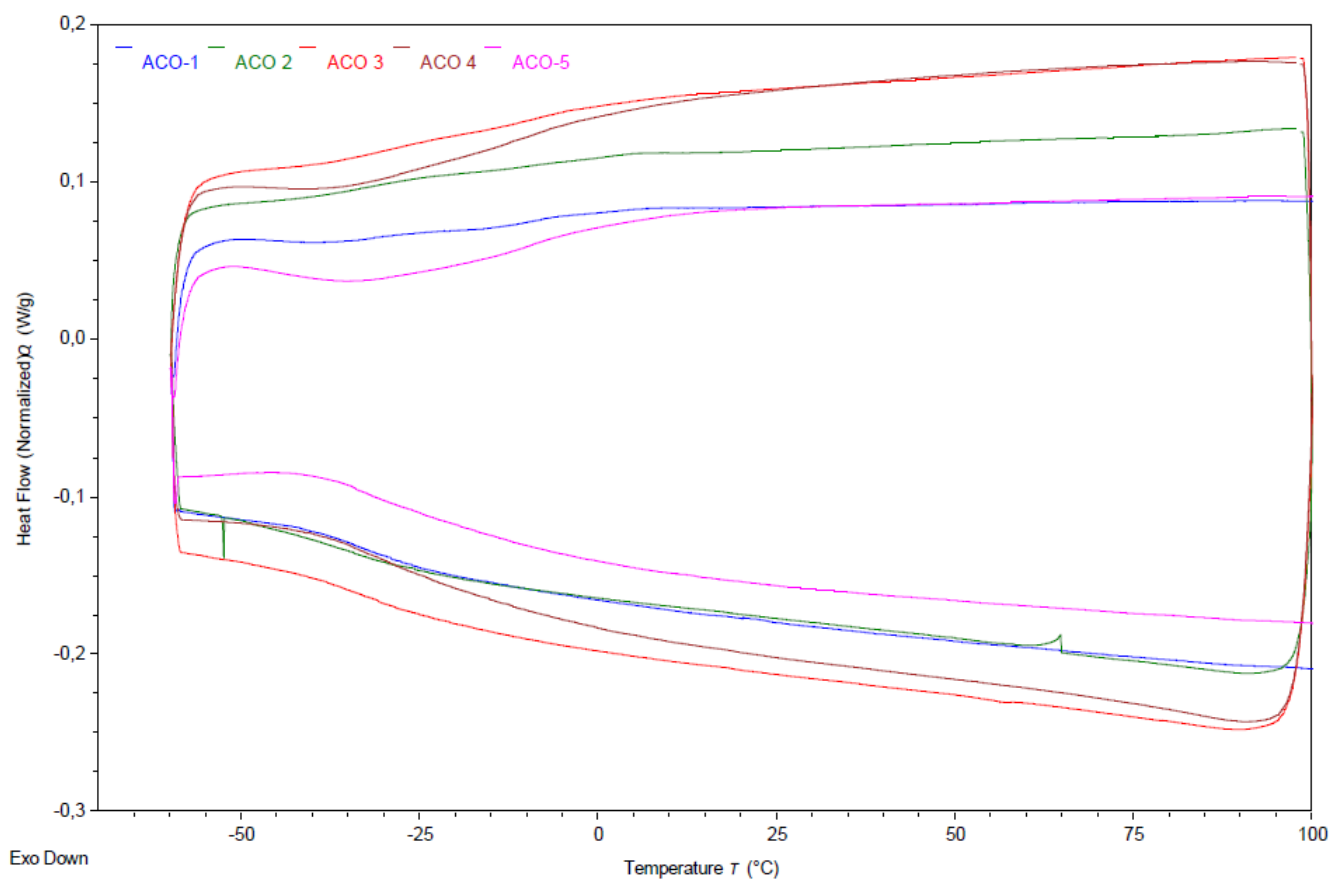

**Figure S7.** DSC heating and cooling curves for the ACO1-5 compounds.

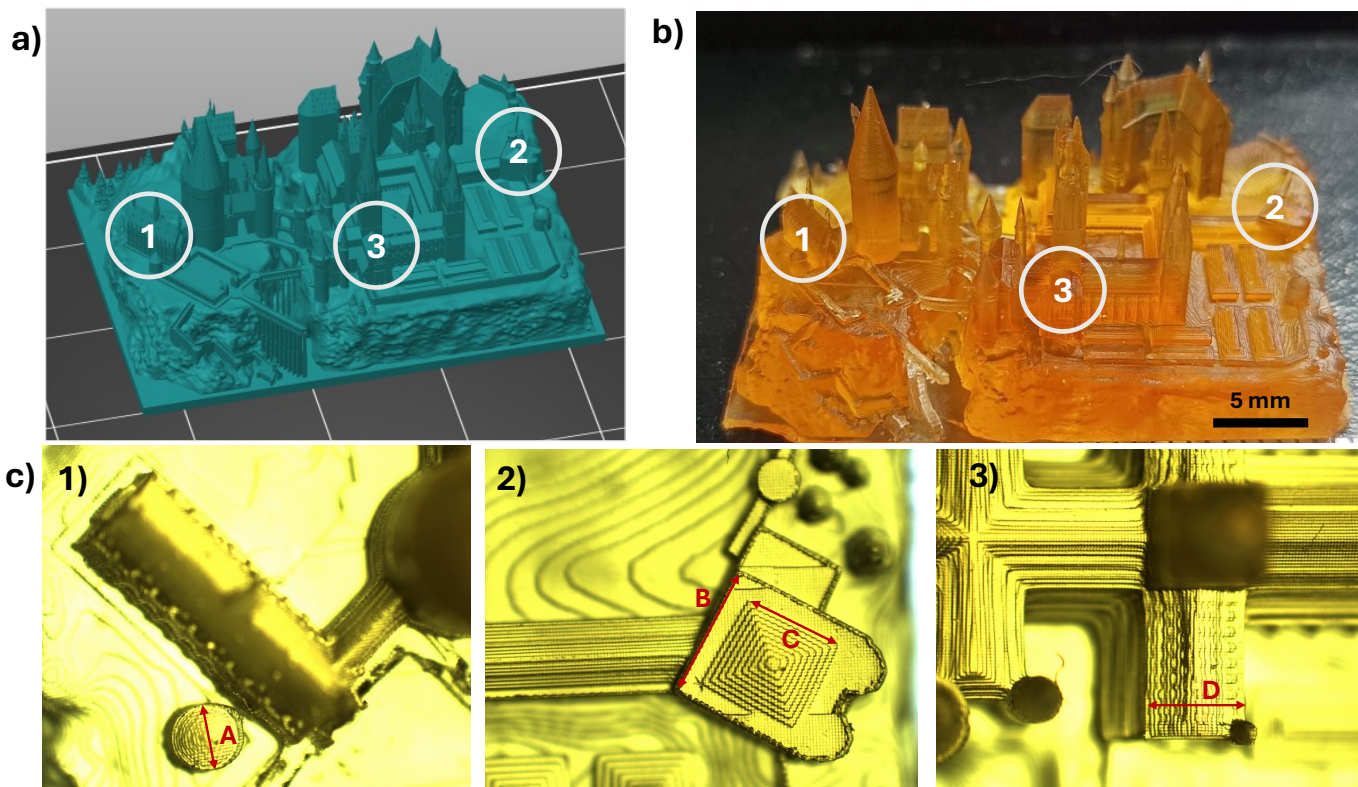

|             | Theoretical size (mm) | Measured size (mm) | Dimensional error (%) | Print Fidelity (%) |
|-------------|-----------------------|--------------------|-----------------------|--------------------|
| A           | 1.094                 | 1.053              | 3.7                   | 96.3               |
| B           | 2.115                 | 2.107              | 0.4                   | 99.6               |
| C           | 1.623                 | 1.600              | 1.4                   | 98.6               |
| D           | 1.597                 | 1.604              | 0.4                   | 99.6               |
| <b>Mean</b> |                       |                    | 1.5                   | 98.5               |

$$\text{Print fidelity} = \left( 1 - \frac{|\text{Theoretical size} - \text{Measured size}|}{\text{Theoretical size}} \right) \times 100$$

**Figure S8.** Print fidelity measurements of the printed Hogwarts castle. a) Castle 3D Model b) Printed object c) Optical microscopy images of different part of the castle.
